# Supplementary material for: Neuropsychological Characterization of Autosomal Recessive Intellectual Developmental Disorder 59 Associated with IMPA1 (MRT59)
Source: MDPI journal article supplement (doi:10.3390/brainsci13071048), 2023-07-10
Supplement: s1 [file s1]

**Table S1.** Sociodemographic data and WASI performance of individual participants

| Participants | Group       | Age   | Education | VC    | BD    | SM   | RM    | VQI | PIQ | FSQI-4 |
|--------------|-------------|-------|-----------|-------|-------|------|-------|-----|-----|--------|
| 1            | MRT59       | 54:2  | SL        | 0/1   | 0/1   | 0/1  | 0/1   | 45  | 45  | 40     |
| 2            | MRT59       | 48:0  | SL        | 17/3  | 0/1   | 3/1  | 1/1   | 52  | 47  | 44     |
| 3            | MRT59       | 50:5  | SL        | 11/2  | 0/1   | 2/1  | 3/2   | 48  | 49  | 43     |
| 4            | MRT59       | 64:1  | SL        | 3/1   | 0/1   | 4/2  | 0/1   | 48  | 45  | 41     |
| 5            | MRT59       | 43:8  | SL        | 0/1   | 0/1   | 0/1  | 0/1   | 45  | 45  | 40     |
| 6            | MRT59       | 60:5  | SL        | 0/1   | 0/1   | 0/1  | 0/1   | 45  | 45  | 40     |
| 7            | MRT59       | 56:10 | SL        | 8/1   | 0/1   | 1/1  | 0/1   | 45  | 45  | 40     |
| 8            | MRT59       | 53:2  | SL        | 16/3  | 0/1   | 2/1  | 2/2   | 51  | 48  | 44     |
| 9            | MRT59       | 51:0  | SL        | 2/1   | 0/1   | 2/1  | 0/1   | 45  | 45  | 40     |
| 10           | carrier     | 54:4  | C         | 49/10 | 28/9  | 27/8 | 20/8  | 93  | 93  | 91     |
| 11           | carrier     | 63:0  | ES        | 23/4  | 9/5   | 9/3  | 7/4   | 64  | 70  | 63     |
| 12           | carrier     | 89:11 | SL        | 29/6  | 4/6   | 11/5 | 9/10  | 76  | 90  | 79     |
| 13           | carrier     | 84:9  | SL        | 24/5  | 2/4   | 2/2  | 2/5   | 61  | 69  | 61     |
| 14           | carrier     | 55:4  | C         | 41/8  | 10/6  | 28/9 | 13/6  | 91  | 78  | 82     |
| 15           | non-carrier | 46:9  | HS        | 58/8  | 29/6  | 36/9 | 26/6  | 107 | 99  | 104    |
| 16           | non-carrier | 75:10 | SL        | 27/6  | 2/4   | 2/1  | 9/8   | 62  | 77  | 66     |
| 17           | non-carrier | 37:00 | C         | 46/9  | 49/11 | 34/9 | 25/10 | 95  | 102 | 99     |
| 18           | non-carrier | 65:03 | SL        | 45/9  | 5/5   | 17/6 | 8/5   | 86  | 72  | 76     |

VC: Vocabulary; BS: Block Design; SM: Similarities; RM: Matrix Reasoning; S.L: semi-literate or no education; ES: elementary school; HS: high school; C: college. VC, BS, SM e RM were expressed using raw and scaled scores (r/s), respectively.

**Table S2.** Functional dependence data in MRT59 participants (n=9)

| Patient | Self-Care |   |   |     |     |   | Sphincter Control |     |        |   |     | Locomotion |   | Communication |    | Social cognition |    |   | Total | Mean |
|---------|-----------|---|---|-----|-----|---|-------------------|-----|--------|---|-----|------------|---|---------------|----|------------------|----|---|-------|------|
|         | E         | G | B | UBD | LBD | T | BM                | BoM | B/C/Wh | T | B/S | W/Wh       | S | C             | Ex | SI               | SP | M |       |      |
| 1       | 2         | 1 | 1 | 2   | 2   | 1 | 7                 | 7   | 7      | 7 | 7   | 7          | 4 | 2             | 2  | 2                | 2  | 2 | 65    | 3.61 |
| 2       | 2         | 1 | 2 | 6   | 6   | 1 | 7                 | 7   | 7      | 7 | 7   | 7          | 4 | 4             | 4  | 4                | 4  | 4 | 84    | 4.66 |
| 3       | 4         | 4 | 4 | 3   | 3   | 3 | 7                 | 7   | 7      | 7 | 7   | 7          | 7 | 4             | 4  | 5                | 2  | 3 | 88    | 4.88 |
| 4       | 2         | 2 | 2 | 6   | 6   | 1 | 6                 | 6   | 6      | 6 | 6   | 7          | 6 | 2             | 2  | 3                | 3  | 3 | 75    | 4.16 |
| 5       | 2         | 1 | 1 | 2   | 2   | 1 | 1                 | 2   | 6      | 6 | 6   | 6          | 2 | 1             | 2  | 1                | 1  | 2 | 45    | 2.50 |
| 6       | 2         | 1 | 1 | 2   | 1   | 1 | 1                 | 1   | 2      | 1 | 1   | 3          | 3 | 2             | 2  | 2                | 1  | 2 | 29    | 1.61 |
| 7       | 2         | 6 | 6 | 6   | 6   | 6 | 7                 | 7   | 7      | 7 | 7   | 7          | 5 | 3             | 3  | 5                | 2  | 3 | 95    | 5.27 |
| 8       | 3         | 4 | 6 | 6   | 6   | 6 | 7                 | 7   | 7      | 7 | 7   | 7          | 5 | 4             | 4  | 5                | 5  | 5 | 101   | 5.61 |

Self-care: F – eating; SC – grooming; B – bathing; UBD – upper body dressing; LBD – lower body dressing; T- toileting; Sphincter control: BM - Bladder management; BoM – Bowel management; Mobility: B/C/Wh – bed/chair/wheelchair; T- toilet; B/S- bath, shower; Locomotion: W – walking, Wh – Wheelchair; S - stairs Communication: C – comprehension; E – expression; Social cognition: SI – social interaction; SP – solving problem; M – Memory.
